# Supplementary material
Source: publisher site journal article supplement (http://www.degruyter.com/publication/journal_key/JOSO/downloadAsset/JOSO_Information%20for%20Authors%20JOSO.pdf)
Supplement: Supplementary file 1 [file JOSO_Information%20for%20Authors%20JOSO.pdf]

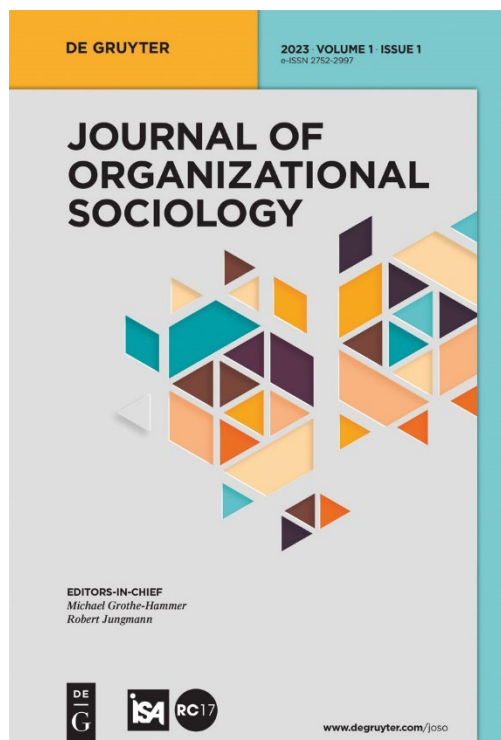

## Aims and Scope

The objective of the *Journal of Organizational Sociology* (JOSO) is to offer a specifically sociological perspective on organization(s) by publishing outstanding and original peer-reviewed articles, which advance the sociological understanding of organization(s), enquiring into their ever-changing internal workings and their relations with each other, as well as examining how organization(s) and society shape each other. It will especially foster sociological debate around this relationship at a global level in a way that is sensitive to regional as well as local specifics. It is intended to be a worldwide forum for scholarly debate that encompasses everything pertaining to the nexus between organization and society.

The journal understands society in a broad sense spanning face-to-face settings, intimate relationships, friendships, and families, fields, markets, and networks,

social classes and inequalities, as well as social domains like politics, civil society, media, culture, religion, science, sports, economy, social work, arts, kinship, ecology, health, love, and so on. It cuts across the different sociological sub-disciplines and is open to the whole diversity of organizations and organizational phenomena – including but not limited to corporations, public administrations, IGOs and other political organizations, NGOs, NPOs, social movements, grassroots initiatives, mass media, platforms, schools, art galleries, churches, sports clubs, courts, and other non-conventional and alternative forms of organization. The journal is published in association with the Research Committee "Sociology of Organizations" of the International Sociological Association (ISA RC17), and regards itself as a vehicle for the promotion of the ISA's general conception of a global sociology.

The uniqueness of the Journal of Organizational Sociology is its dual focus on (1) the sociology of organizations, but also (2) the organizational aspects of forms of social life more generally. The journal thus intends to explore the full spectrum of the organizational dimensions of sociology. It covers the full range of sociological theory traditions and writing styles; no tradition in sociology or organizational theory is favoured above another.

We seek papers that advance sociological theories on organization(s) or that use organizational sociology to provide a better understanding of social phenomena. Submissions featuring mainstream perspectives in organizational sociology are as welcome as articles that advance or apply alternative sociological perspectives. In addition, submissions featuring psychological, managerial, educational, or other theories and themes are welcome, as long as they make a distinctive sociological argument and contribute to sociological debates with specific reference to questions of organizational structure, dynamics, processes, practices, interaction or culture.

The journal is double-blind peer-reviewed, published in English, open-access and issued three times a year by De Gruyter.

The journal offers free format of submission. After your manuscript is conditionally accepted, please format your manuscript according to the Instructions for Authors.

### Article Types

- Standard papers are full-length **research articles** that can be either based on empirical research findings or conceptual in nature. Articles must be between 6,000-10,000 words in length (including abstract, references, notes, tables, and figures). Over-length submissions will be returned without review.
- **Essays** are shorter pieces pursuing a distinctive argument and/or using sociological theory to understand organizational phenomena and/or using organizational sociology to understand other social phenomena. Essays are peer reviewed and must be between 2,000-6,000 words in length (including abstract, references, notes, tables, and figures). Over-length submissions will be returned without review.
- **Review Essays** provide the opportunity to offer detailed interrogations of key and original published works. Review Essays can engage with one or several works (books, articles, movies, art pieces, etc) and must make an original argument. Review essays are peer reviewed and should be between 3,000-5,000 words. Sole book reviews won't be accepted.
- **Beacons of Organizational Sociology** occasionally cover English translations of outstanding papers that can inform the worldwide debate on organizational sociology. Beacons are normally commissioned, but you are welcome to send proposals to the editors (no self-nominations).

### Peer review, turnaround times and preprint policies

#### Peer review information

JOSO is a double-blind journal. Manuscripts are reviewed anonymously by at least two independent reviewers selected by the Editors. The authors may provide the names, institution, country and e-mail addresses of up to two potential reviewers. Authors may also provide names of reviewers they wish to exclude from reviewing their manuscripts.

The editors reserve the right to reject submitted manuscripts without peer review if the studies are not novel or important enough to merit publication in the journal. Manuscripts deemed unsuitable (insufficient originality or limited interest to the target audience) will be also rejected without review.

#### Turnaround time

JOSO aspires to inform authors of the peer review decision within 6-8 weeks from submission date. Revised manuscripts should be returned within 2-6 months. Accepted articles will be published online within 2–4 weeks of acceptance.

### Issue based publication

Articles are first published online as DOI citable articles and are later assigned to an issue with final page numbers.

### Rejection of manuscripts

Manuscripts dealing with subjects that have been well studied in the literature, and that do not resolve questions raised by previous studies, or manuscripts that are statistically underpowered, are likely to be rejected without peer review.

Reporting of negative results must be justified by prior evidence that a positive result would be expected. Manuscripts are also returned to authors if they do not comply with the Instruction for Authors (e.g., if the number of words allowed for a certain article type will be exceeded).

### Appeals

Manuscripts that have been rejected for publication will be reconsidered only at the discretion of the Editor(s). Authors wishing to request reconsideration of a previously rejected manuscript must do so in written form and submit a rebuttal by e-mail to the journal's editorial office. Authors should provide detailed reasons why they believe the manuscript should be reconsidered. If the rebuttal is accepted, the author will be asked to re-submit the manuscript, or the decision will be reversed.

### Preprint policy

De Gruyter does not consider the following purposes of a paper as pre-publication: publication in the form of a congress abstract, publication as an academic thesis, publication as an electronic preprint on recognized servers such as arXiv, RePEc, bioRxiv, ResearchSquare, etc.

### Inclusive language policy

Inclusive language recognizes diversity, conveys respect for all people, is sensitive to differences and promotes equal opportunities. Content should not make assumptions about readers' beliefs or commitments; should not contain anything that might suggest that one person is superior to another because of age, gender, race, ethnicity, culture, sexual orientation, disability or health condition; and should use inclusive language throughout. Authors should ensure that their writing is free from prejudice, stereotypes, slang, references to the dominant culture and/or cultural assumptions.

We advise the following approach: Aim for gender neutrality by using plural nouns (clinicians, clients, participants) as standard and avoiding “he” or “she”, wherever possible. Instead, please use “they”. We recommend avoiding the use of descriptors that refer to personal characteristics such as age, gender, race, ethnicity, culture, sexual orientation, disability or health status unless they are relevant and valid.

## Submission of manuscripts

Submit manuscripts exclusively online at: <https://mc.manuscriptcentral.com/joso>

Please create yourself an account and submit your manuscript. You will be guided through the submission process. To allow a double-blind peer review, please split your word document into two files: a “Title Page” with all author information, and a “Main Document” with your manuscript.

### Author roles in ScholarOne Manuscripts

We strongly recommend that authors register with institutional e-mail addresses, and refrain from using private e-mail addresses. Feel free to submit a cover letter for each manuscript upon first submission. It may contain a brief statement by the authors as to the element of novelty upon which they base their request for publication in *JOSO*. If you submit a cover letter, please address it to the Editors-in-Chief. Revised manuscripts must be accompanied by a point-by-point reply to the reviewers’ criticisms.

### ORCID

The ORCID (Open Researcher and Contributor ID) is a non-profit, publisher-independent system that is used to uniquely identify academics and their publications. Click [here](#) for detailed information about ORCID. Submitting authors can login with username and password. When submitting manuscripts via ScholarOne, authors can also login with their ORCID number. Providing an ORCID number for each author is strongly recommended.

### Submission declaration and verification

For information on plagiarism, please refer to [COPE – Committee of Publication Ethics](#). Submission of a manuscript to a journal implies that the work described has not been published previously, except in the form of an abstract, academic thesis, lecture, or preprint; that it is not under consideration for publication elsewhere (multiple, redundant, concurrent publication); that publication of the work is approved by all authors and tacitly or explicitly by the responsible authorities where the work was carried out; and that, if accepted, it will not be published elsewhere, in English, or in any other language, without the written consent of the Publisher. Exceptions are listed under Preprint policy.

To exclude potential overlap with prior publication(s), your manuscript may be checked by the plagiarism checker Crossref Similarity Check, [iThenticate](#). Previously published material must be referenced appropriately in the manuscript, regardless of whether the material was previously published in a subscription based, hybrid or open access journal, or in another language.

### Scientific misconduct

Only articles that have not been or will not be published elsewhere will be published in the journal, excluding articles that fall under De Gruyter’s [Repository Policy](#). Multiple submissions/publications or redundant publications (i.e., republication of data already published by the same authors) will be rejected. If identified

after publication, the journal reserves the right to publish a retraction note. In any case, the Editor will follow COPE's Code of Conduct and implement its advice.

### Research integrity

The authors are responsible for all aspects of the study and will ensure that any questions regarding the accuracy and integrity of any part of the work are adequately investigated and resolved.

With submitting your manuscript to *JOSO* the authors declare that they are the sole and intellectual authors of the manuscript, and that no artificial intelligence was involved in drafting the manuscript.

In case of doubt, the Editor reserves the right to ask the authors to submit the raw experimental data.

### Post-acceptance

#### Galley proofs

The corresponding author of an article receives the galley proofs in electronic form to check them for editing and typesetting accuracy. Corresponding authors receive an e-mail notification ("Check your proof") with a link to the online proofreading system (Proof Central) through which they can access their galley proofs. The interface is similar to MS Word: authors can edit the text by entering their corrections directly, adding comments, and answering questions from the copy editor. If preferred, authors can also annotate and upload edits to the PDF version.

All instructions for proof corrections, including deadlines, will be given in the e-mail notification to the corresponding author, along with a user guide, providing step-by-step instructions for inserting corrections.

Substantial changes to an article accepted for publication will only be considered with the permission of the Editor or after additional peer review. The responsibility for proofreading lies solely with the authors. **According to De Gruyter policy, once an article has been accepted, no changes to the author list and article title are allowed (except typos). The De Gruyter production team is instructed to enforce this policy during the production/proof correction process.**

#### Offprints

Electronic files of typeset articles in Adobe Acrobat PDF format are provided free of charge. The corresponding author will receive an e-mail notification when the article has been published online along with instructions on how to access the article.

#### Repository policy

Please find detailed information here: [Repository Policy](#).

#### Copyright

Manuscripts are accepted on condition of transfer of copyright ([License to Publish](#)) (for U.S. government employees: to the extent transferable) to the publisher. Once the manuscript has been accepted, it may not be published elsewhere without the consent of the copyright holders.

### **Open Access publication**

All De Gruyter open access publications are published under a [Creative Commons license](#). The Creative Commons licenses specify the extent to which the work can be re-used by the scholarly community and the general public. For us as publisher, this means that we receive non-exclusive exploitation rights.

Permitted third party reuse of gold open access articles is determined by the user license. The majority of all De Gruyter journals are published under the Creative Commons license CC-BY 4.0 (<http://creativecommons.org/licenses/by/4.0>), but there are exceptions. The Creative Commons license is specified in the 'License to Publish', which you can download from the journal's website.

### **License Agreement**

During submission of an article, authors will be asked to complete a ['License to Publish'](#).

### **Article Processing Charges (APCs)**

Authors who publish in **open access journals** normally pay Article Processing Charges (APCs). The publishing of a research article in *JOSO* is free of charge.

In some cases, open access is funded by an unrestricted educational grant, but this plays no role in the selection or publication of articles and has no influence on peer review. We may also consider requests for individual discounts or waivers, but only for journals whose APCs are not already discounted.

For more information on De Gruyter's open access policy, please read our [Open Access Policies](#).

### **Ethical conduct of research**

**Manuscripts must follow certain ethical guidelines** to be considered for publication. These can generally be found in the [Publication Ethics and Malpractice Statement](#). Accordingly, **before submitting your manuscript, please make sure that you and your co-authors agree to the applicable requirements.**

For example, this may involve declaring and ruling out conflicts of interest or proving compliance with legal requirements related to human and animal testing.

Furthermore, our [Code of Conduct for Publication Procedures and Ethics](#) defines the responsibility of De Gruyter as a publisher and the Editors we work with, to ensure the legitimacy and quality of our published research. Our principles are based on the guidelines of the [Committee on Publication Ethics \(COPE\)](#).

### **Informed consent**

The [Protection of Privacy](#) is a legal right that must not be infringed without individual informed consent. In cases where the identification of personal information is necessary for scientific reasons, authors should

obtain full documentation of informed consent, including written permission from the patient or their legal guardians prior to inclusion in the study. The following (or similar) statement should be given in the Methods section: *Informed consent was obtained from all individuals included in this study.*

If required for submission, submit the “[Template for Ethical and Legal Declarations](#)” file that asks you to comment on Informed Consent. Provide the same information here. Make sure the information in the text of the manuscript matches the information in the template. If informed consent was not required, insert *Not applicable.* after informed consent in the “[Template for Ethical and Legal Declarations](#)”.

### Conflict of interest

A conflict of interest for a particular manuscript exists when a participant in the peer review and publication process – author, reviewer, and Editor – has ties to activities that could inappropriately influence his or her judgment, regardless of whether the judgment is actually affected. Financial relationships with industry (for example, employment, consultancies, stock ownership, honoraria, patent applications, expert testimony, grants and other funding), either directly or through immediate family, are usually considered the most important conflicts of interest. However, conflicts can occur for other reasons, such as financial support of the study, ties to health insurance, politics or other stakeholders, personal relationships, academic competition, and intellectual passion.

To ensure fair and objective decision-making, authors must declare any associations that pose a conflict of interest (financial, personal or professional) in connection with the manuscript under evaluation. This must be declared during the submission process and also at the end of the manuscript. If you do not have a statement to make, please insert *None declared.* The conflict-of-interest statement should appear on the title page of double-blinded journals, and before the Reference section of single-blinded journals. If applicable, submit a file called “[Template for Ethical and Legal Declarations](#)” that asks you to comment on the Conflict of Interest. Provide the same information here as in the manuscript. Make sure that the information in the manuscript matches the information in the template.

If you do not have a statement to make, the default statement will be set in place: *The authors state no conflict of interest.*

### Author contributions

In view of research integrity, authorship is generally confined to an individual who has made a substantial intellectual or practical contribution to the conception or design of the project or the acquisition, analysis, or interpretation of data for the work of a publication and/or has drafted the work or reviewed/revised it critically for important intellectual content. The individual(s) listed as author(s) must agree to be accountable for said contribution and approve of the final version. **Honorary authorship is not allowed.**

Individuals who helped or participated in certain substantive aspects of the project or work (e.g., technical services staff), but whose contributions were not of sufficient extent to be listed as co-authors, should be appropriately acknowledged, usually in an Acknowledgements section.



Authors must declare their responsibility for the entire content of the manuscript and may indicate the individual contributions of each author, if applicable. The author contribution statement should appear on the title page before the Reference section as the following default statement: *All authors have accepted responsibility for the entire content of this manuscript and approved its submission.* or *The author has accepted responsibility for the entire content of this manuscript and approved its submission.*

If required for submission, submit the “[Template for Ethical and Legal Declarations](#)” file that asks you to comment on Author Contribution. Provide the same information here as in the manuscript. Make sure that the information in the manuscript matches the information in the template.

### Research funding

Funding sources should be listed at the end of the manuscript, before the References and/or indicated in the “[Template for Ethical and Legal Declarations](#)”, if required for submission, after Research Funding. When the study benefitted from funding through an unrestricted grant or other resources provided to a university, college, other research institution, or an individual author, state the name of the institute or organization that provided the funding along with the grant number, if applicable.

If no funding was provided for the research, the default statement will be set in place: *None declared.*

### Acknowledgments

Authors may wish to acknowledge individuals, working groups, institutions, etc. who provided help and support (other than financial) during research and the preparation of the manuscript (e.g., language checking, writing assistance or proof reading of the article, etc.). Individuals acknowledged are not included on the title page, as a footnote to the title or otherwise.



## Preparation of manuscript

### Title page information

Please provide the following information on the “Title Page” (extra document to allow double-blind peer review) during the submission process:

- Author names

Write at least one given and family name in full. For all other names, initial is sufficient. List authors in the order you want them to appear in the final version. Indicate the corresponding author by using an asterisk “\*” after the family name. Please note that as per De Gruyter policy, no author list changes are permitted after acceptance of a manuscript.

Author footnotes (superscript letters or numbers) to explain authorship details are not all allowed in the author line and will be converted to an author note on the first page. Kindly stick to the wording as in the examples below:

- [Full name author A] and [full name author B] contributed equally to this work.
- [Full name author A] and [full name author B] contributed equally to this work and share first authorship.
- [Full name author A] and [full name author B] share senior authorship.
- [Full name author A] and [full name author B] share first authorship.
- De Gruyter does not allow the use of the Author Randomization Tool of the American Economic Association.

- Title and short title

Provide a descriptive, concise and comprehensible main title as well as an abbreviated form of the main title with no more 75 characters (including blanks). The short title (running head) will be displayed on the top of each page of the final version. The article title and subtitle should be in title case. Use uppercase letters after colon.

- Affiliations

For the corresponding author supply the following details: e-mail address, department, institution, street, city, postal code and country; for all other authors department, institution, city, postal code and country are mandatory. Please also provide all details concerning the current institutional affiliation, in case you changed affiliation during the manuscript preparation and publication process.

Supplying an ORCID is highly recommended (for more information and registration, please visit the ORCID webpage: <https://info.orcid.org/benefits-for-researchers/>)

- Please also indicate the word count, number of tables and figures, and whether your manuscript contains supplementary material. Please note: For a proper text-figure/table ratio, kindly stick to the general guideline of one figure or table per page.

## Language

All manuscripts must be written in clear and concise English. Please use British or American English consistently. If you have reasons to doubt your proficiency with respect to spelling, grammar, etc. (e.g., because English is not your native language), then you may wish to employ—at your expense—the services of a professional language editor.

## General format and manuscript elements

Please see the [Manuscript checklist](#) for detailed information on length and structure of specific article types. Kindly hand in your manuscript in single-column format.

### Abstract

Give a concise summary of your article in an abstract of approx. 250 words in a single paragraph. As abstracts are published separately by abstracting and indexing services, please spell out abbreviations at first use and do not include footnotes, tables, figures or equations. Avoid using references. If it is essential to use a reference in the abstract, please expand it as per journal reference style.

### Keywords

Keywords are used by abstracting and indexing services as well as search engines to facilitate finding your paper. Together with the abstract of your paper, they are a key tool enabling readers to find your paper and for increasing citations. Supply 3–6 specific keywords in alphabetical order and lower case, separated by comma. These can be single words, but also short phrases representing the content. Make sure to select precise and concise keywords to your field or sub-field of research. Avoid abbreviations and the repetition of words already used in the article's title.

### Headings

Your manuscript should be subdivided into sections (and, if necessary, subsections). These sections should be labeled with headings in a consistent format and with a clear hierarchy of section headings. Limit your subsections to a maximum of four levels. For subdivided sections ensure that they have at least two subheadings on one level. Headings do not have an end period. Headings should be numbered and in title case. Use uppercase letters after colon, even for articles.

### References

Please adhere strictly to the **Chicago reference style** of *JOSO* as outlined in the [Reference Style Sheet](#). The style sheet provides examples for different types of citations in the text as well as for different bibliographic items in the reference list. Please note: All references mentioned in the reference list must be mentioned in the text, and vice versa.

### Figures and figure captions

Graphs, line drawings, photographs, schemes, diagrams, etc. may be used to illustrate your findings.

Publication of color figures is provided free of charge in both online and print editions. The publication quality always depends directly on the quality and size of the delivered data.

Please label the illustrations as “Figure”. Each figure should be uploaded separately as .jpg, .eps, .png or .tiff file. Images should have a minimum resolution of 300 dpi (color or black-white pixel graphics/half-tone images) in the intended size (600dpi combination of pixel graphic and line drawing, 1200dpi for line drawings). When drawing bar graphs, use patterning/color instead of grey scales (faint shading may be lost upon reproduction). Figures should not display any frames. Please remove figure headings and do refrain from back-coloring.

Figures should be numbered consecutively using Arabic numerals (from 1) throughout the text. If you include multi-part figures, please make sure to label all part figures by using uppercase letters in closed rounded brackets (e.g., (A)). Please make sure that all figures are explicitly referred to in the text. Do not end the text immediately preceding the suggested positioning of a figure with a colon and avoid expressions such as “in Figure 1 below/above”, as the exact positioning of these elements cannot be determined until after the manuscript has been typeset. Note that figures will usually be placed on the top or the bottom of the page in the final layout.

Provide a concise and self-explanatory caption for each figure. In case of multi-part figures, please include a main caption as well as part figure captions. The main caption should be separated from the part figure captions by a full stop, e.g., Figure 1: This is the main caption. (A) This is part figure caption A, (B) this is part figure caption B.

The key to the symbols depicted in the figures should be included in the figure itself, where possible.

Otherwise, include it in the caption. The caption itself should not be included in the figure.

Please make sure that letters, numbers, symbols, text, etc. included in the figure are clear, easy to read (not below 6pt, preferably in Arial or Helvetica) and uniform in style.

It is the authors' responsibility to use images that do not infringe on any copyrights, performing rights, trademark rights, personal rights or any other third-party rights or are otherwise unlawful. Copyright permissions can be obtained through the Copyright Clearance Center (<https://www.copyright.com/>).

### Tables and table captions

Number tables consecutively using Arabic numerals. Tables should be provided in an editable source format (Word, LaTeX). Please avoid handing in tables as image or Excel files.

Provide a short descriptive title, column heads, and (if necessary) footnotes to make each table self-explanatory. In column heads, use parentheses for units (e.g., Velocity (m/s)). Use footnotes in alphabetical order (a, b, c, etc.) to give emphasis or further information. Expand abbreviations used in tables in footnotes. In case bold type or italics are used to highlight information, please explain their meaning.

Avoid color, shading, vertical lines, and other cell borders. Note that most horizontal lines within the table body will be removed during the production process.

Indicate where to place the table approximately (e.g., [Place Table 1 near here]). Do not end the text immediately preceding the suggested positioning of a table with a colon and avoid expressions such as “in Table 1 below/above”, as the exact positioning of these elements cannot be determined until after the

manuscript has been typeset. Note that tables will usually be placed on the top or the bottom of the page in the final layout.

### Abbreviations

*JOSO* accepts standard international abbreviations. The use of abbreviations and acronyms is permitted given that they are expanded in full when used the first time with the abbreviation in parentheses (applies to abstract and main text). Please use them consistently thereafter. Avoid using non-standard abbreviations unless they appear more than three times in the text. We recommend providing a list with an overview of all abbreviations.

### Symbols and equations

The use of symbols should correspond to international recommendations. Symbols which could be mistaken, such as 1 (numeral) and I, l (letters), 0 (numeral) and o, O (letters) must be clearly recognizable. Nuclide symbols should be written as  $^{235}\text{U}$  and not as U235 or U-235.

Equations should be well-aligned and not crowded. Use only Latin and Greek alphabets. Special care is required for superscripts, subscripts, limits of Integration etc. Avoid complicated superscripts and subscripts by introducing new symbols. Avoid repetition of a complicated expression by representing it with a symbol. For MS Word submissions create equations using the Microsoft equation editor or a corresponding add-on. Do not submit math equations as images, but as editable text. Number displayed equations consecutively with Arabic numerals (if referred to in the text). Equations should be cited as “Eq. (1)”.

### Units

Use SI units. For more information, please visit <https://www.bipm.org/en/home>

### Audio and video

For all examples connected to an audio/video recording, supply audio/video clips. Deliver these clips as separate files and do not integrate them directly into the manuscript.

Name all your clips using the following convention:

e.g., audio-1-smith.MP3, video-1-smith.MP4,

[media]-[identifier]-[author-family-name].[extension]

Indicate the position in the article by placing a marker as follows:

[associated audio-1-smith.wav with example (1)]

Provide a short caption for each media file and number them consecutively. Any other media files can be included as part of the supplementary material.

File naming: audiosupplement-1-smith.MP3,

[media.supplement]-[identifier]-[author-family-name].[extension]

The following formats are preferred: audio files in MP3 (at least 16 bit) and video files in MP4 (at least a height of 480 pixels and a frame rate of 25). However, other common formats are also permitted.

### Appendices

Use appendices for information that supports your findings but is not essential for the understanding of your paper (e.g., lengthy mathematical proofs, questionnaires, graphics, correspondence with other

researchers). Cite appendices within the main text. Tables and figures in the appendix should be numbered consecutively as follows: Figure A.1, Table A.1, Figure A.2, Table A.2, etc. The appendix is placed at the end of the main text before the reference list.

### **Supplementary material**

Supplementary material which may offer further information on your work, but cannot be printed in view of its scope, can be published online only. Supplementary material may contain extensive tables, additional figures, questionnaires for discussed surveys, protocols, code samples, datasets, multimedia files (audio, video, animations), etc. If the manuscript is accepted, supplementary material will be referenced in the print version, but will be published online only.

Please provide supplementary material data as separate file(s) of no more than 10 MB during submission. Note that the material should be publication-ready (not in track-changes mode), as it will not be typeset, but published exactly as supplied. Within the text, the supplementary material must be cited consecutively and be referred to as supplementary material data (e.g., see Supplementary Material, Fig. 1).

### **For any further questions please contact:**

Michael Grothe-Hammer ([michael.grothe-hammer@ntnu.no](mailto:michael.grothe-hammer@ntnu.no))

Robert Jungmann ([jungmann@uni-trier.de](mailto:jungmann@uni-trier.de))

Editors-in-Chief

Ulrike Kitzing ([Ulrike.Kitzing@degruyter.com](mailto:Ulrike.Kitzing@degruyter.com))

Journal Coordinator De Gruyter
